# Supplementary material for: Design and application of a multi-hazard risk rapid assessment questionnaire for hill communities in the Indian Himalayan region
Source: Copernicus journal article supplement (doi:10.5194/nhess-23-1267-2023), 2023-04-04
Supplement: Supplementary file 1 [file nhess-23-1267-2023-supplement.zip]

Archive with 2 entries (2 files):
- Proposed survey form 20 march 2023.xlsx
- nhess-23-1267-2023-supplement-title-page.pdf
