# Supplementary material for: Design and application of a multi-hazard risk rapid assessment questionnaire for hill communities in the Indian Himalayan region
Source: Copernicus journal article supplement (doi:10.5194/nhess-23-1267-2023), 2023-04-04
Supplement: Supplementary file 1 [file nhess-23-1267-2023-supplement.zip › nhess-23-1267-2023-supplement-title-page.pdf]

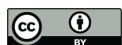

*Supplement of*

## **Design and application of a multi-hazard risk rapid assessment questionnaire for hill communities in the Indian Himalayan region**

**Shivani Chouhan and Mahua Mukherjee**

*Correspondence to:* Shivani Chouhan (s\_chouhan@dm.iitr.ac.in)

- nhess-23-1267-2023-supplement-title-page.pdf
- Proposed survey form 20 march 2023.xlsx

The copyright of individual parts of the supplement might differ from the article licence.
