# Supplementary material for: Design and application of a multi-hazard risk rapid assessment questionnaire for hill communities in the Indian Himalayan region
Source: Copernicus journal article supplement (doi:10.5194/nhess-23-1267-2023), 2023-04-04
Supplement: Supplementary file 1 [file Proposed survey form 20 march 2023.xlsx]

## Sheet: Proposed survey form for IHR
	Rapid Visual Screening (RVS) form
	SURVEYOR
	1	Name of the Surveyor
	2	Mobile no. of Surveyor
	3	Inspection Data
	4	Inspection Time
	GENERAL INFORMATION
	5	Name of Building/Owner
	6	Address
	7	Town/City, District and State
	8	Coordinatnates
	9	Total No. of Building Blocks present inpremises
	10	Name of Block to be survey
	11	Draw Sketch of Site Plan
	12	Function of Block	Residential (Individual House)		Residential (Appartments)		Residential (Other)
			Educational (School)	Educational (College)	Educational (Institute/ University)
			Lifeline (Hospital)	Lifeline (Police Station)	Lifeline (Fire Station)	Lifeline (Power Station)	Lifeline (Water/ Sewage Plant)
			Commercial (Hotel)	Commencial (Shopping)	Commercial (Recreational)		Commercial (Other)
			Office (Govt.)		Office (Private)
			Mixed Use (Residential and Commercial)		Mixed Use (Residential and Induustrial)		Mixed Use (Other)
			Industrial (Agriculture)		Industrial (Live Stick)		Industrial (Other)
	13	Occupancy in day time	0 to 10	11 to 50	51 to 100	101 to 1000	more than 1000
	14	Occupancy in night time	0 to 10	10 to 20	51 to 100	101 to 1000	more than 1000
	15	Name of Owner
	16	Name of Contact Person
	17	Contact No. of Contact Person
	18	Year of Construction:
	19	Structural or Construction drawings available?	Yes		No
	20	Total built up area (sq.m)
	21	No. of Floors	Low Rise (1 to 3)	Mid Rise (4 to 7)		High Rise (7 and above)
	22	What is the overall Construction quality	Excellent	Good	Average	Poor	Very Poor
	23	What is the overall Maintainance Status	Excellent	Good	Average	Poor	Very Poor
	DISASTER HISTORY
	24	Seismic Zone	Zone V	Zone IV	Zone III	Zone II	Don’t know
	25	Did this area faced any Major disaster?:	Yes		No
	26	If Yes in Q.25, Which Disaster?:	Earthquake	Flood	Landslide	Wind	Industrial
			Fire	Other	If Other, Specify
	27	If Yes in Q.25, in which date/year
	28	If Yes in Q.25,What is the major damage status	No effect	Minimum Effect	Medium Effect	Maximum Effect
	29	Is the building Retrofitted/ Renovated ever?	Yes		No
	30	If Yes in Q.29, Year of last renovated?
	SITE CONDITION
	31	Location of Building:	Isolated	Internal Corner		End
	32	Slope of Ground:	Flat Terrain	Gentle Slope	Steep Slope	Terraced land
	33	Cut & Fill Material:	RCC	Hybrid		Other
	34	Is there Visible cracks on the ground	Yes, Many		Yes, few		No
	35	Is there any open space in the property?	Yes, more than 1500 sq.ft		Yes, less than 1500 sq.ft		No
	36	What is the total area of Open spaces in the campus (in sq.ft) :
	BUILDING GEOMETRY
	37	Shape of Building Block in Plan:	Square	Rectangle (L<=3B)	Narrow Rectangle (L>3B)	Rectangle with courtyard	L-Shaped
			T-Shaped	U-Shaped	E-Shaped with Central courtyard	H-Shaped	Other
	38	Shape of building Block in Elevation: No. of Reentrants corner in Plan	Not stepped	Stepped near centre	Stepped near the end	Heavy upper floor
	39	No. of Reentrants corner in Plan
	40	Is extra strength available in reentrants corner?	Yes		No
	41	No. of Floors	only G	G+1	G+2	G+3	> G+4
	FOUNDATION
	42	Type of Sub Soil:	Rock	Gravel or Sand		Soft or Medium	Other
	43	Type of Foundation:	Strip		Raft		Isolated
			Pile		Combined		Other
	44	Basic Construction material of Foundation:	Adope	Stone	Brick	RCC	Other
	45	Mortar Material in Foundation:	Dry Masonry	Mud	Lime	Cement	Other
	46	Plinth beam available?	Yes	No
	47	Sinking in Foundation?	Yes		Partial	No
	48	If Yes or Partial in Q.47, What is the Reason for Sinking?	Cause of nearest water resources		Without any water resources		Other (specify)
	49	Depth of ground water table					Don't know
	WALL
	50	Type of Wall:	Brick	Stone	Confined	RCC	Other
					Only Column available & No Beams	Column & Beam, both available
	51	Is through-stone used in Stone Wall?	Yes	Partial	No
	52	What is the Wall material?	Adobe or Mud Wall	River Boulder wall	Quarry Stone wall	Dressed wall	fired brick wall
			hollow concrete block wall			Other
	53	Type of mortar	Dry masonry	Mud	Lime	Cement	Other
	54	Thickness of interior Wall (in mm):	< 115 mm	115 mm (4.5")	230 mm (9")	230 to 450 mm	> 450 mm
		Length of longest interior wall (in meter)
		Max. Height of the wall (in meters)
	55	Thickness of exterior Wall (in mm):	< 115 mm	115 mm	230 mm	230 to 450 mm	> 450 mm
		Length of longest exterior wall (in meter)
	56	Thickness of Mortar (in mm):
	57	How many Separation of walls at T and L junction?
	58	Wall Failure type observed:	Bulging of wall	delaminating of wall	tilting of walls	dampness in wall	No failure
		No. of walls with these failures
	EARTHQUAKE BANDS
	59	Which of the Earthquake bands available?	Plinth Band	Sill Band	Lintel Band	Roof Band
			Gable Band	Door Band	Window Band	Corner Band	No Band
	60	If Bands available in Q.59, What is theMaterial of Band:	Wood	Reinforced brick	Reinforced concrete	Other (Specify)
	61	If Bands available in Q.59, Thickness of Band (in mm):
	62	If bands available in Q59, Are the bands continuous?	Yes	Partial	No		Don’t know
	CRACKS
	63	Type of Cracks:	Structural cracks		Superficial cracks		N/A
		Note: Superfial cracks are seen in one side of wall, on the other hand structural cracks can be seen on both side of the wall
	64	Type of Structural cracks:	Diagonal cracks	Vertical cracks	Horizontal Cracks	Remark
		Specify, No. of Cracks in each case
		Specify, Length of cracks in each case (in cm)
		Grade of Cracks	Grade 5	Grade 4	Grade 3	Grade 2	Grade 1
	65	Are there any cracks on	Column	Beam	Near Openings	Near corner	No cracks
	OPENING
	66	Is there any opening(s) larger than 50% of the length of the wall	Yes, all		Yes, few	No
	67	Are there any opening close to wall junction or corner or to floor/roof	Yes, all		Yes, few	No
	68	Is frames available around the door?:	Yes		Partial	No
	69	If Yes/Partial in Q.68, What is the material of Frame used:	Wooden	MS/SS	other (Specify)
	70	Is frames available around the window	Yes		Partial	No
	71	If Yes/Partial in Q.70, What is the material of Frame used:	Wooden	MS/SS	other (Specify)
	72	Is Grills available around the window?:	Yes		Partial	No
	ROOF AND FLOOR
	73	Type of Roof:	Flat Roof	One side slope	two side slope	four side slope	Other (specify)
	74	Material of Roof:	RCC		Reinforced brick slab	Tile or slate	CGI Sheets
			Jack arch roof		Wooden	Other (Specify)
	75	Are the roof anchored into the wall	Yes		Partial	No
	76	Type of Roof failures observed	Sagging	Cracks	Dampness	Other	No failure
	77	Type of Flooring	Mud	Stone	Concrete	Wood/ bamboo	Mosaic floor tile
	POUNDING EFFECT DETAILS
	78	Height of Structure /Block (in meters)
	79	Is there any adjacent building, which is very close (no gaps) to this building	Yes	with very little gap			No
	80	Distance from nearest buildings (in meters)
	81	Quality of adjacent building	Very Good	Good	Moderate	Poor	Very Poor
	HEAVY WEIGHT ON TOP
	82	Type of Heavy weight present on the top of the building?	water tank (Concrete)	Water tank (Plastic)	Car Parking on the top of the building		Big hoarding
			Heavy generator/ machine	Communication tower	Roof top Garden	Other	None
	83	If Yes in Q.82, What is the Position of Heavy weight?	Centric	Eccentric	Distributed	Corners	Remark
	84	Are the heavy weight intact properly with structure?	Yes		Partial	No
	PARAPET WALL
	85	Is Parapet wall present at roof	Yes		Partial	No
	86	If Yes or Partial in Q.85, What is the Material of Parapet Wall?	Lightweight (Wooden, MS/SS)		Heavy weight (RCC, Brick)		Remark
	87	Intact with structure	Yes		Partial	No
	OVERHANGS
	88	Overhangs present	Yes			No
	89	Length of overhangs (meters)
	90	Overhangs with structural	Yes			No
	91	Overhangs with Brackets /beam	Yes			No
	STAIRCASE
	92	Staircase present	Yes			No
	93	Staircase placed at symmetrical location in plan of the bulding	Symmetrical			Un-symmetrical
	94	If Yes in Q.92, What is the Material of Staircase?	RCC	Brick	Wooden	MS/SS	Other
	95	If Yes in Q.68, Is Staircase intact with building structure?	Yes			No
	96	Lift Status?	Intact	Not Intact		Not Available
	COLUMN
	97	Column available?	Yes			No
	98	If yes in Q.97, What is the type of Column?	Short Column			Long Column
	99	Material of Column	Concrete	Masonry (Brick/ Stone)	Wood	Steel	Other
	BEAM
	100	Beam available?	Yes			No
	101	If Yes in Q.100., Beam with infill walls available?	Yes		Partial	No
	102	If Yes in Q.100., Beam – Column connections?	Centric		Eccentric		Other
	103	Beam -Beam Connection?	Centric		Eccentric		Other
	104	If Yes in Q.100., Material of Beam	Concrete	Masonry (Brick/ Stone)	Wood	Steel	Other
	BASEMENT
	105	Is Basement Available?	Yes			No
	106	If Yes in Q.105, No. of Basement
	107	Effective height of column in basement?	Short Column			Long Column
	108	Retaining wall available ?	Yes			No
	109	If Yes in Q.108, What is the Material of the retaining wall ?	RCC	Brick	Stone	Other
	SOFT STOREY
		A soft story building is a multi-story building in which one or more floors have windows, wide doors, large unobstructed commercial spaces, or other openings in places where a shear wall would normally be required for stability as a matter of earthquake engineering design.
	110	Soft Storey available ?	Yes			No
	111	Effective height of column in basement?	Short Column			Long Column
	112	Is shearwall available in Soft Storey?	Yes		Partialy	No
	113	Retaining wall available ?	Yes			No
	114	If Yes in Q.113, What is the Material of the retaining wall ?	RCC	Brick	Stone	Other
	MULTI HAZARD SURVEY FORM
	FLOOD
	1	Is the site low lying or prone to water logging?	Yes			No
	2	Is there any water body near the site?	Yes			No
	3	What is the type of water body and whether it is prone to flooding?	Lake, flood prone	Lake, not flood prone	River, flood prone	River, not flood prone	N/A
	4	What is the distance from the nearest water body?	0 - 250 M	250 - 500 M	500 - 1000 M	1 KM - 2 KM	2 KM and above
	5	What is the potential damage level due to the expected duration of flooding?	Very High	High	Medium	Low	Very Low
	6	Is the plinth made up of non-erodible material?	Yes			No
	7	What is the height of the plinth? (in meters)
	HIGH WIND
	8	What is the average wind speed in this location	Maximum Speed		Minimum Speed
	9	Are there trees and/or towers too close to the building that may fall on it during high wind/cyclone?	can stop building from functioning		threat can damage building but not hamper functioning		No threat
	10	Do the door and windows have a good and accessible latch?	if neither doors or windows have accessible and good latches.		If some of the doors and windows have accessible and good latches		If both doors and windows have accessible and good latches
	11	Is there a covered walkway for building to building connection?	no covered walkway		weak covered walkway		strong covered walkway
	LANDSLIDE
	12	Is there any hills near to the building, which can cause damage due to landslide	Yes			No
	13	If Yes in Q.12, what is the distance of the base off the Hill from building?	Less Than 30 M	30 M - 100 M	100 - 250 M	250 - 500 M	More than 500 M
	14	Is the slope near the building stabilized?	Yes			No
	15	Are there any large rocks or potential falling hazards near the building?	Yes			No
	16	Are there barriers to rockfall ?	Yes			No
	INDUSTRY
	17	Is there any industry near to the building, which can cause damage due to industrial hazard, fire etc.	Yes			No
	18	If Yes in Q.17, how many active industries are there?	Yes			No
	19	What is the distance of nearest Industry from building?	0 - 100 M	100 - 250 M	250 - 500 M	500 - 1000 M	More than 1 km
	20	What is the distance of nearest Petrol Pump from building?	0 - 100 M	100 - 250 M	250 - 500 M	500 - 1000 M	More than 1 km
	FIRE
	21	Are the access roads from main street wide enough to allow one fire engine to reach, reverse and return to the main road?	two or more such access roads		one such access road		No access road
	22	Are there potential fire threats within 30 meters of the building such as petrol pump, electrical substation, combustible materials store, etc.?	Yes			No
	23	Is there adequate open assembly area for people during any emergency?	enough space	inadequate open space (1-4 square feet per student)		Negligible
	24	Is main meter box and switch box located in the staircase/ entrance lobby/ passage/ corridor?	Yes			No
	25	Are the main meter box and switch box enclosed in a metallic box?	Yes			No
	26	Is there more than 1 staircase which can be used as a fire escape staircase ideally at maximum distance from the other staircase?	Yes			No
	27	In case of Public building or Life line building, Are there proper signages in the campus for Emergency Exit, Fire equipment etc.?	Yes			No
	28	Is the kitchen located at a safe distance from classrooms, staircase, passage corridor?	Yes, beyond 50 m	Yes, within 20-50 m	Yes, within 10-20 m	adjacent	Kitchen Not Available
	29	Is the ceiling material safe from fire?	Yes			No
	30	What is the status of fire safety equipment in the building?	100% - Fire extinguisher in each floor of each block	75% - Fire extinguisher in 3/4th of all floors	50% - Fire extinguisher in half of all floors	25% - Fire extinguisher in 1/4th of all floors	0% - No Equipment
	31	Is the transformer too close to the compound wall or inside the building?	Yes			No
	32	Are there overhead cables running through or near premises/building?	Yes			No
	33	If there is a forest area near the building?	Yes			No
	34	What is the distance of the tree line from the building?
	35	Is there any combustible construction material present in the building?	Yes			No
	CLIMATE CHANGE
	36	How much do you think climate change threatens your personal health and safety?	Very Likely	Likely	Neutral	Unlikely	Very Unlikely
	37	Which issues are of more concern in your opinion? (On the scale of 10, more marks to most concerned)	Climate change/Global Warming	Poverty	Over-population	Un-employment	Crime
			Infectious Diseases	Economic Situation	Unplanned Infrastructure	Deforestation	Air pollution
			Water pollution	Tourism growth	Poor Waste Management	Extinction of species	Traffic
	38	In your opinion, What is the reason that the temperature on earth has been rising over the past decade?	Human Activities	Natural Causes	No Change	Don't know	Other
	39	How much do you think the following has contributed to global climate change? (on scale of 10, more marks to most contributer)	Deforestation	Overpopulation	Tourist growth	Landuse Landcover	Greenhouse gases
			Industrilization	Melting of Ice	Warming of water surface	Other	Don’t know
	NON-STRUCTURAL RISK/ FALLING HAZARD
	40	List of Nonstructural elements which are vulnerable to falling or not attached properly	Element	Need Attention	Number	Element	Need Attention
			Fan			Window Frames at Roof
			Tubelight			Door
			Electrical Wires			Window Frames
			AC			Heavy Machineries
			Open Shelve (Glass)			Cylinder in Open space
			Open Shelve (Iron)			Board
			Wardrobe (Wooden)			Ventilator
			Wardrobe (Iron)			Fire Extinguisher
			HeavyTable			Cantilever Chimneys
			Heavy Frames			Cantilever Balconies
			Heavy Furnitures			Cantilever Sunshared
			Heavy weight on top of almirah			Other
	41	No. of Exits in the Room:
	41	What is the status of Electrical Safety in the Room	Good		Ok		Poor
	Abbreviations: CGI: Corrugated Galvanized Iron; DPC: Damp-Proof Course; G: Ground floor; GL: Ground Level; H: House position; MS: Mild Steel; RCC: Reinforced Cement Concrete; SS: Stainless Steel.
